# Supplementary material
Source: PubMed Central journal article supplement (PMC4176932)
Supplement: NIHMS586250-supplement-01.pdf [file NIHMS586250-supplement-01.pdf]

## SUPPLEMENTARY INFORMATION

### **Life extension factor klotho enhances cognition**

Dena B. Dubal, Jennifer S. Yokoyama, Lei Zhu, Lauren Broestl, Kurtresha Worden, Dan Wang, Virginia E. Sturm, Daniel Kim, Eric Klein, Gui-Qiu Yu, Kaitlyn Ho, Kirsten E. Eilertson, Lei Yu, Makoto Kuro-o, Philip L. De Jager, Giovanni Coppola, Gary W. Small, David A. Bennett, Joel H. Kramer, Carmela R. Abraham, Bruce L. Miller, Lennart Mucke

## SUPPLEMENTAL RESULTS

**Supplemental Table 1, Related to Experimental Procedures.** Human and mouse cohorts analyzed in different experiments.

|                                                | <b>Fig. Panel</b> | <b>Humans or Mice per Group</b>                 | <b>Total Number</b>     | <b>From *Cohort</b> | <b>Age at Analysis</b> |
|------------------------------------------------|-------------------|-------------------------------------------------|-------------------------|---------------------|------------------------|
| <b>Humans: GENETICS and COGNITION</b>          |                   |                                                 |                         |                     |                        |
| Cohort 1                                       | 1A,2A<br>S1       | Non-carriers 179<br>KL-VS carriers 41           | 220 humans              | A                   | 52–85 years            |
| Cohort 2                                       | 1B,2B<br>S1       | Non-carriers 331<br>KL-VS carriers 135          | 466 humans              | B                   | 55–85 years            |
| Cohort 3                                       | 1C,2C<br>S1       | Non-carriers 20<br>KL-VS carriers 12            | 32 humans               | C                   | 52–78 years            |
| <b>Humans: SERUM ENZYME-LINKED IMMUNOASSAY</b> |                   |                                                 |                         |                     |                        |
| Cohort 1                                       | 3A                | Non-carriers 118<br>KL-VS carriers 38           | 156 humans              | A                   | 55–85 years            |
| <b>Mice: LONGEVITY</b>                         |                   |                                                 |                         |                     |                        |
|                                                | 3C                | NTG 29, KL 22                                   | 51 mice                 | D                   | 3 wks–36 mos           |
| <b>Mice: COGNITION AND BEHAVIOR</b>            |                   |                                                 |                         |                     |                        |
| Water maze                                     | 3D,E, S2          | NTG 9, KL 8                                     | 17 mice                 | E                   | 10–12 mos              |
| Water maze                                     | 3F,G, S2          | NTG 19, KL 17                                   | 36 mice                 | F                   | 4–7 mos                |
| Fear conditioning                              | 4B, S3            | NTG 7, KL 6                                     | 13 mice                 | G                   | 6 mos                  |
| Y-maze                                         | 4A                | NTG 10, KL 8                                    | 18 mice                 | H                   | 3–4 mos                |
| Open field, elev plus                          | 4C,D              | NTG 14–15, KL 13–14                             | 27–29 mice              | I                   | 3 mos                  |
| Water maze                                     | 6A,B              | NTG 7, KL 7                                     | 14 mice                 | J                   | 3–4 mos                |
| Fear conditioning + Ifen                       | 7E                | NTG: Veh 19, Ifen 15<br>KL: Veh 17, Ifen 8      | 59 mice                 | K                   | 5–7 mos                |
| Y-maze + Ifen                                  | 7F                | NTG: Veh 9, Ifen 11<br>KL: Veh 10, Ifen 10      | 40 mice                 | L                   | 10–12 mos              |
| Y-maze + Ro 25-6981                            | 7G,H              | NTG: Veh 19, Ro25 16<br>KL: Veh 18, Ro25 14     | 67 mice                 | M                   | 3–5 mos                |
| Fear conditioning                              | S6C               | NTG: Veh 9, Ifen 9                              | 18 mice                 | N                   | 3.5–4.5 mos            |
| <b>Mice: BIOCHEMISTRY &amp; HISTOLOGY</b>      |                   |                                                 |                         |                     |                        |
| Western                                        | 3B                | NTG 18, KL 19                                   | 37 mice                 | O                   | 3–4 mos                |
| Western                                        | S4A–E             | NTG 13, KL 14–15                                | 27–28 mice              | O                   | 3–4 mos                |
| Western                                        | 5B–E,G<br>S6A,B   | NTG 15–17, KL 17–18                             | 32–35 mice              | P                   | 3–4 mos                |
| Immunohistochemistry                           | 6A                | NTG 7, KL 7                                     | 14 mice                 | J                   | 3–4 mos                |
| qPCR                                           | S4F               | NTG 17, KL 18                                   | 35 mice                 | P                   | 3–4 mos                |
| <b>Mice: ELECTROPHYSIOLOGY</b>                 |                   |                                                 |                         |                     |                        |
| fEPSP (LTP)                                    | 6C                | NTG 4 slices/4 mice<br>KL 8 slices/6 mice       | 12 slices,<br>10 mice   | Q                   | 3.5–4.5 mos            |
| fEPSP (I/O curves)                             | 6D                | NTG 5 slices/3 mice<br>KL 9 slices/5 mice       | 14 slices,<br>8 mice    | Q                   | 3.5–4.5 mos            |
| Evoked EPSC and decay                          | 6F,G              | NTG 7–10 slices/3 mice<br>KL 5–10 slices/3 mice | 12–20 slices,<br>6 mice | R                   | 3–4 mos                |
| Evoked EPSC and decay                          | 7B–D              | NTG 6–7 slices, 3 mice<br>KL 5 slices, 3 mice   | 11–12 slices,<br>6 mice | R                   | 3–4 mos                |
| sEPSC                                          | S5                | NTG 15 cells/2 mice<br>KL 17 cells/2 mice       | 32 cells,<br>4 mice     | S                   | 3–4 mos                |

\*Cohorts are independent groups of humans or mice, some or all of which were analyzed at one or more time points/ages in one or more paradigms.

**Supplemental Table 2, Related to Figure 1.** Selection criteria for each population of aging individuals without dementia that was studied. For analyses, individuals between 52–85 years with MMSE scores of 28 or greater were drawn from Cohorts 2 and 3 (replication cohorts) to parallel cognitive profiles and demographics of Cohort 1 (the discovery cohort).

| <b>Inclusion Criteria</b>            |                                                                                                                       | <b>Exclusion Criteria</b>                                                  |
|--------------------------------------|-----------------------------------------------------------------------------------------------------------------------|----------------------------------------------------------------------------|
| <b>Cohort 1 (Discovery cohort)</b>   |                                                                                                                       |                                                                            |
|                                      | Stable medical condition for three months                                                                             | Memory complaints                                                          |
|                                      | Fluent in English                                                                                                     | Diagnosed memory condition                                                 |
|                                      | Age 40 years or above                                                                                                 | Neoplastic disease                                                         |
|                                      | Able to complete assessment                                                                                           | Parkinson's disease                                                        |
|                                      | Medical history, physical exam, neurologic exam, and clinical tests completed without meeting any exclusion criteria. | Multiple sclerosis, untreated                                              |
|                                      |                                                                                                                       | Sleep apnea                                                                |
|                                      |                                                                                                                       | Stroke                                                                     |
|                                      |                                                                                                                       | Current or past psychiatric disorder by DSM-IV criteria                    |
|                                      |                                                                                                                       | Abnormal brain MRI                                                         |
|                                      |                                                                                                                       | Abnormal neurologic exam                                                   |
| <b>Cohort 2 (Replication cohort)</b> |                                                                                                                       |                                                                            |
|                                      | Older individuals without known dementia                                                                              | None (medical co-morbidities allowed)                                      |
|                                      | Annual detailed clinical evaluation and blood donation                                                                |                                                                            |
|                                      | Agree to organ donation at death                                                                                      |                                                                            |
| <b>Cohort 3 (Replication cohort)</b> |                                                                                                                       |                                                                            |
|                                      | Willingness to participate in studies on memory and aging                                                             | Baseline dementia or mild cognitive impairment                             |
|                                      |                                                                                                                       | Medical or psychiatric illnesses                                           |
|                                      |                                                                                                                       | Use of medications that might affect cognition (ie, sedatives)             |
|                                      |                                                                                                                       | Use of non-steroidal anti-inflammatory drugs                               |
|                                      |                                                                                                                       | Inability to undergo MRI because of pacemakers or hip replacement implants |

**Supplemental Table 3, Related to Figure 1.** Demographics for each population of aging individuals without dementia studied. All individuals, except for three in Cohort 3, were Caucasian.

| Study           | Demographics                | Non-carrier<br>(n=530)<br>Mean (SD) | KL-VS carrier<br>(n=188)<br>Mean(SD) |
|-----------------|-----------------------------|-------------------------------------|--------------------------------------|
| <b>Cohort 1</b> |                             |                                     |                                      |
|                 | Genotype                    | 179                                 | 41                                   |
|                 | Age (yrs)                   | 67.53(7.38)                         | 68.56(7.76)                          |
|                 | Education (yrs)             | 17.25(2.02)                         | 17.40(2.42)                          |
|                 | Male/Female                 | 71/112                              | 23/20                                |
|                 | ApoE4 Carriers              | 41                                  | 8                                    |
|                 | CDR total                   | 0                                   | 0                                    |
|                 | MMSE                        | 29.54(0.66)                         | 29.44(0.71)                          |
| <b>Cohort 2</b> |                             |                                     |                                      |
|                 | Genotype                    | 331                                 | 135                                  |
|                 | Age (yrs)                   | 77.84(5.34)                         | 78.12 (5.52)                         |
|                 | Education (yrs)             | 15.04 (2.96)                        | 17.89(2.15)                          |
|                 | Male/Female                 | 82/249                              | 39/96                                |
|                 | <sup>#</sup> ApoE4 Carriers | 79                                  | 30                                   |
|                 | MMSE                        | 29.02(0.78)                         | 29.07(0.76)                          |
| <b>Cohort 3</b> |                             |                                     |                                      |
|                 | Genotype                    | 20                                  | 12                                   |
|                 | Age (yrs)                   | 62.85(7.51)                         | 64.50(7.83)                          |
|                 | Education (yrs)             | 16.40 (2.68)                        | 18.00 (3.41)                         |
|                 | Male/Female                 | 17/5                                | 4/8                                  |
|                 | <sup>#</sup> ApoE4 Carriers | 7                                   | 2                                    |
|                 | MMSE                        | 29.35(0.75)                         | 29.83(0.39)                          |

SD=standard deviation; MMSE=Mini Mental State Exam; CDR=Clinical Dementia Rating; <sup>#</sup>Some APOE ε4 genotypes were unknown: Cohort 2 (12 KL-VS non-carriers and 9 KL-VS carriers); Cohort 3 (1 KL-VS non-carrier).

**Supplemental Table 4, Related to Figure 1.** Cognitive functions and domains represented in neuropsychological tests analyzed in Cohorts 1–3.

| <b>*Broad Cognitive Domains</b> | <b>*Specific Cognitive Functions</b>                                 | <b>Cohort 1 Tests</b><br>Refs (Kramer et al., 2003; Pa et al., 2010) | <b>Cohort 2 Tests</b><br>Refs (Bennett et al., 2012; Wilson et al., 2002) | <b>Cohort 3 Tests</b><br>Refs (Small et al., 2006; Small et al., 2012) |
|---------------------------------|----------------------------------------------------------------------|----------------------------------------------------------------------|---------------------------------------------------------------------------|------------------------------------------------------------------------|
| Language                        | Semantic/Phonemic Generation                                         | Category & Phonemic Fluency                                          | Category Fluency                                                          | Category & Phonemic Fluency                                            |
| Executive                       | Working Memory, Attention/Inhibition, Processing Speed, Set Shifting | Digit Span Backwards, Modified Trails, Stroop Color Naming           | Digit Span Backwards, Digit Ordering, Stroop Color Naming                 | Digit Span Total, Trails A+B, Stroop Interference                      |
| Visuospatial                    | Spatial Memory, Spatial Processing                                   | Benson Figure Delay                                                  | Line orientation                                                          | Benson Figure Delay                                                    |
| Learning & Memory               | Auditory/Verbal Episodic Learning & Memory                           | CVLT II Short Recall                                                 | Delayed Word List Recognition, Delayed Story Recall                       | Slope Logical Memory                                                   |

\*Though distinctly categorized, tests often reflect multiple cognitive functions and domains. For example, semantic and phonemic generation are influenced by verbal, language, and executive abilities.

**Supplemental Table 5, Related to Figures 1 and 2.** KL-VS is associated with better cognition in a meta-analysis of cohorts and in each of the three independent human cohorts included in the meta-analysis. The linear statistical model provides an estimate of change in global composite Z-score and includes age, sex, education, and KL-VS genotype, with or without *APOE*  $\epsilon$ 4 carrier status, as predictors for cognitive performance. Inclusion of *APOE*  $\epsilon$ 4 in the model did not contribute significant variance ( $p=0.64$ , meta-analysis) or change results associating KL-VS with enhanced cognition.

|                                                                                         | Estimate | Std Error | t value | p value                | Significance |
|-----------------------------------------------------------------------------------------|----------|-----------|---------|------------------------|--------------|
| <b>Meta-analysis of Cohorts 1–3</b>                                                     |          |           |         |                        |              |
| Age                                                                                     | -0.02    | 0.00      | -5.57   | $3.54 \times 10^{-8}$  | ***          |
| Sex (F)                                                                                 | 0.24     | 0.08      | 3.10    | $2.07 \times 10^{-3}$  | **           |
| Education                                                                               | 0.07     | 0.01      | 5.38    | $1.00 \times 10^{-7}$  | ***          |
| Genotype, KL-VS                                                                         | 0.33     | 0.08      | 4.10    | $4.41 \times 10^{-5}$  | ***          |
| <b>Meta-analysis of Cohorts 1–3 (<i>APOE</i> <math>\epsilon</math>4 added to model)</b> |          |           |         |                        |              |
| Age                                                                                     | -0.02    | 0.00      | -5.42   | $8.16 \times 10^{-8}$  | ***          |
| Sex (F)                                                                                 | 0.24     | 0.08      | 3.01    | $2.73 \times 10^{-3}$  | ***          |
| Education                                                                               | 0.07     | 0.01      | 5.34    | $1.29 \times 10^{-7}$  | ***          |
| <i>APOE</i> $\epsilon$ 4                                                                | -0.03    | 0.08      | -0.46   | 0.64                   | –            |
| Genotype, KL-VS                                                                         | 0.32     | 0.08      | 3.95    | $8.61 \times 10^{-5}$  | ***          |
| <b>Cohort 1</b>                                                                         |          |           |         |                        |              |
| Age                                                                                     | -0.05    | 0.01      | -5.62   | $5.87 \times 10^{-8}$  | ***          |
| Sex (F)                                                                                 | 0.05     | 0.13      | 0.41    | 0.68                   | –            |
| Education                                                                               | 0.11     | 0.03      | 3.59    | $4.17 \times 10^{-4}$  | ***          |
| Genotype, KL-VS                                                                         | 0.39     | 0.16      | 2.45    | 0.01                   | *            |
| <b>Cohort 1 (<i>APOE</i> <math>\epsilon</math>4 added to model)</b>                     |          |           |         |                        |              |
| Age                                                                                     | -0.05    | 0.01      | -5.59   | $6.76 \times 10^{-8}$  | ***          |
| Sex (F)                                                                                 | 0.07     | 0.13      | 0.53    | 0.60                   | –            |
| Education                                                                               | 0.11     | 0.03      | 3.62    | $3.62 \times 10^{-4}$  | ***          |
| <i>APOE</i> $\epsilon$ 4                                                                | 0.14     | 0.14      | 1.03    | 0.30                   | –            |
| Genotype, KL-VS                                                                         | 0.40     | 0.16      | 2.51    | 0.01                   | *            |
| <b>Cohort 2</b>                                                                         |          |           |         |                        |              |
| Age                                                                                     | -0.05    | 0.01      | -6.38   | $4.44 \times 10^{-10}$ | ***          |
| Sex (F)                                                                                 | 0.25     | 0.10      | 2.52    | 0.01                   | *            |
| Education                                                                               | 0.09     | 0.01      | 6.20    | $1.25 \times 10^{-9}$  | ***          |
| Genotype, KL-VS                                                                         | 0.25     | 0.09      | 2.64    | $8.61 \times 10^{-3}$  | **           |
| <b>Cohort 2 (<i>APOE</i> <math>\epsilon</math>4 added to model)</b>                     |          |           |         |                        |              |
| Age                                                                                     | -0.05    | 0.01      | -6.07   | $2.77 \times 10^{-9}$  | ***          |
| Sex (F)                                                                                 | 0.25     | 0.10      | 2.55    | 0.01                   | *            |
| Education                                                                               | 0.09     | 0.02      | 6.20    | $1.34 \times 10^{-9}$  | ***          |
| <i>APOE</i> $\epsilon$ 4                                                                | -0.10    | 0.09      | -1.11   | 0.27                   | –            |
| Genotype, KL-VS                                                                         | 0.23     | 0.09      | 2.47    | 0.01                   | *            |
| <b>Cohort 3</b>                                                                         |          |           |         |                        |              |
| Age                                                                                     | -0.07    | 0.03      | -2.89   | 0.01                   | *            |
| Sex(F)                                                                                  | 0.04     | 0.40      | 0.11    | 0.91                   | –            |
| Education                                                                               | 0.04     | 0.06      | 0.77    | 0.45                   | –            |
| Genotype, KL-VS                                                                         | 0.63     | 0.32      | 1.95    | 0.06                   | #            |
| <b>Cohort 3 (<i>APOE</i> <math>\epsilon</math>4 added to model)</b>                     |          |           |         |                        |              |
| Age                                                                                     | -0.07    | 0.03      | -2.80   | 0.01                   | *            |
| Sex (F)                                                                                 | -0.04    | 0.43      | -0.08   | 0.94                   | –            |
| Education                                                                               | 0.04     | 0.06      | 0.70    | 0.49                   | –            |
| <i>APOE</i> $\epsilon$ 4                                                                | -0.20    | 0.32      | -0.64   | 0.53                   | –            |
| Genotype, KL-VS                                                                         | 0.59     | 0.35      | 1.69    | 0.10                   | #            |

# = near significance

**Supplemental Table 6, Related to Figures 1 and 2.** Probing for a sex by KL-VS interaction and an age by KL-VS interaction on cognition. A linear statistical model was used to probe for a Sex:KL-VS interaction and an Age:KL-VS interaction on cognition in the meta-analysis of three cohorts. The model provides an estimate of change in global composite Z-score and includes age, sex, education, and KL-VS genotype as predictors for each interaction. For the Sex:KL-VS analysis, no significant interaction effect was identified. A power analysis with the current sample size and observed variation revealed that the effect would need to result in a change (or estimate) of  $-0.48$  in the cognitive score (compared to the current estimate of  $-0.25$ ) to be detected with 80% power at the  $\alpha = 0.05$  significance level. Inclusion of *APOE*  $\epsilon 4$  in the linear statistical model did not contribute significant variance ( $p=0.61$ ) or change results for a Sex:KL-VS interaction on cognition. For the Age:KL-VS analysis, the interaction reached near significance for demonstrating that KL-VS-associated cognitive enhancement decreases with increasing age. A power analysis with the current sample size and observed variation revealed that the effect would need to result in a change (or estimate) of  $-0.028$  in the cognitive score (compared to the current estimate of  $-0.02$ ) to be detected with 80% power at the  $\alpha = 0.05$  significance level. Inclusion of *APOE*  $\epsilon 4$  in the linear statistical model did not contribute significant variance ( $p=0.72$ ) or significantly change results of the effects of Age:KL-VS interaction on cognition.

|                                                                                            |                                                                                            | Estimate                              | Std Error | t value | p value               | Significance |
|--------------------------------------------------------------------------------------------|--------------------------------------------------------------------------------------------|---------------------------------------|-----------|---------|-----------------------|--------------|
| <b>Sex:KL-VS Analyses</b>                                                                  | <b>Meta-analysis of three cohorts</b>                                                      |                                       |           |         |                       |              |
|                                                                                            | Age                                                                                        | -0.02                                 | 0.00      | -5.52   | $4.64 \times 10^{-8}$ | ***          |
|                                                                                            | Sex (F)                                                                                    | 0.31                                  | 0.09      | 3.39    | $7.32 \times 10^{-4}$ | ***          |
|                                                                                            | Education                                                                                  | 0.07                                  | 0.13      | 5.43    | $7.52 \times 10^{-8}$ | ***          |
|                                                                                            | Genotype, KL-VS                                                                            | 0.74                                  | 0.30      | 2.50    | 0.01                  | *            |
|                                                                                            | Sex (F):KL-VS                                                                              | -0.25                                 | 0.17      | -1.44   | 0.15                  | -            |
|                                                                                            | <b>Meta-analysis of three cohorts (<i>APOE</i> <math>\epsilon 4</math> added to model)</b> |                                       |           |         |                       |              |
|                                                                                            | Age                                                                                        | -0.02                                 | 0.00      | -5.38   | $1.05 \times 10^{-7}$ | ***          |
|                                                                                            | Sex (F)                                                                                    | 0.31                                  | 0.09      | 3.35    | $8.45 \times 10^{-4}$ | ***          |
|                                                                                            | Education                                                                                  | 0.07                                  | 0.13      | 5.40    | $9.17 \times 10^{-8}$ | ***          |
|                                                                                            | <i>APOE</i> $\epsilon 4$                                                                   | -0.04                                 | 0.08      | -0.51   | 0.61                  | -            |
|                                                                                            | Genotype, KL-VS                                                                            | 0.75                                  | 0.30      | 2.52    | 0.01                  | *            |
|                                                                                            | Sex (F):KL-VS                                                                              | -0.26                                 | 0.17      | -1.50   | 0.13                  | -            |
|                                                                                            | <b>Age:KL-VS Analyses</b>                                                                  | <b>Meta-analysis of three cohorts</b> |           |         |                       |              |
| Age                                                                                        |                                                                                            | -0.02                                 | 0.01      | -4.11   | $4.47 \times 10^{-5}$ | ***          |
| Sex (F)                                                                                    |                                                                                            | 0.24                                  | 0.08      | 3.13    | $1.85 \times 10^{-3}$ | ***          |
| Education                                                                                  |                                                                                            | 0.07                                  | 0.01      | 5.32    | $1.36 \times 10^{-7}$ | ***          |
| Genotype, KL-VS                                                                            |                                                                                            | 1.56                                  | 0.76      | 2.06    | 0.04                  | *            |
| Age:KL-VS                                                                                  |                                                                                            | -0.02                                 | 0.01      | -1.63   | 0.10                  | #            |
| <b>Meta-analysis of three cohorts (<i>APOE</i> <math>\epsilon 4</math> added to model)</b> |                                                                                            |                                       |           |         |                       |              |
| Age                                                                                        |                                                                                            | -0.02                                 | 0.01      | -3.87   | $1.18 \times 10^{-4}$ | ***          |
| Sex (F)                                                                                    |                                                                                            | 0.24                                  | 0.08      | 3.05    | $2.42 \times 10^{-3}$ | ***          |
| Education                                                                                  |                                                                                            | 0.07                                  | 0.01      | 5.26    | $1.95 \times 10^{-7}$ | ***          |
| <i>APOE</i> $\epsilon 4$                                                                   |                                                                                            | -0.03                                 | 0.08      | -0.36   | 0.72                  | -            |
| Genotype, KL-VS                                                                            |                                                                                            | 1.75                                  | 0.76      | 2.30    | 0.02                  | *            |
| Age:KL-VS                                                                                  |                                                                                            | -0.02                                 | 0.01      | -1.88   | 0.06                  | #            |

F=Female; #near significance

**Supplemental Table 7, Related to Figure 3.** Klotho serum levels were significantly increased in individuals with one KL-VS allele. The linear statistical model provides an estimate of change in klotho levels. The model includes age, sex, education, and KL-VS genotype as predictors for klotho levels (pg/mL). There is an age effect that reaches near significance for showing that klotho levels decrease with increasing age, an effect previously reported (Semba et al., 2011; Yamazaki et al., 2010). A power analysis with the current sample size and observed variation revealed that the age effect would need to result in a change (or estimate) of  $-9.50$  in pg/mL of klotho levels (compared to the current estimate of  $-5.88$ ) to be detected with 80% power at the  $\alpha = 0.05$  significance level. Inclusion of *APOE*  $\epsilon 4$  in the linear statistical model revealed that it did not contribute significant variance ( $p=0.79$ ) or change results of the effects of KL-VS genotype on klotho levels.

|                                                                      | Estimate | Std Error | t value | p value | Significance |
|----------------------------------------------------------------------|----------|-----------|---------|---------|--------------|
| <b>Cohort 1</b>                                                      |          |           |         |         |              |
| Age                                                                  | -5.88    | 3.41      | -1.70   | 0.08    | #            |
| Sex (F)                                                              | 33.95    | 41.97     | 0.81    | 0.42    | -            |
| Education                                                            | 2.50     | 10.35     | 0.24    | 0.81    | -            |
| Genotype, KL-VS                                                      | 104.27   | 48.40     | 2.15    | 0.03    | *            |
| <b>Cohort 1 (<i>APOE</i> <math>\epsilon 4</math> added to model)</b> |          |           |         |         |              |
| Age                                                                  | -5.78    | 3.41      | -1.70   | 0.09    | #            |
| Sex (F)                                                              | 35.69    | 42.58     | 0.84    | 0.40    | -            |
| Education                                                            | 2.50     | 10.39     | 0.24    | 0.81    | -            |
| <i>APOE</i> $\epsilon 4$                                             | 11.42    | 42.06     | 0.27    | 0.79    | -            |
| Genotype, KL-VS                                                      | 105.72   | 48.84     | 2.17    | 0.03    | *            |

F=Female; #near significance



**Supplemental Table 8, Related to Figure 3.** Probing for a sex effect and a sex:klotho interaction on cognition in water maze testing of young and middle-aged mice. A mixed model ANOVA (factors: genotype and day) including effects of repeated measures was used as described (Young et al., 2009). No significant main effects of sex or sex:klotho interaction were identified.

|                                                    | Estimate | Std Error | t value | p value | Significance |
|----------------------------------------------------|----------|-----------|---------|---------|--------------|
| <b>Young mice: Hidden Training, watermaze</b>      |          |           |         |         |              |
| Sex (F)                                            | -2.43    | 60.71     | -0.04   | 0.97    | -            |
| Sex (F):klotho                                     | -64.33   | 87.85     | -0.73   | 0.95    | -            |
| <b>Middle-age mice: Hidden Training, watermaze</b> |          |           |         |         |              |
| Sex (F)                                            | 61.53    | 77.79     | 0.79    | 0.44    | -            |
| Sex (F):klotho                                     | -25.66   | 110.02    | -0.23   | 0.82    | -            |
| <b>Young mice: Probe Trial</b>                     |          |           |         |         |              |
| Sex (F)                                            | -4.21    | 6.16      | 5.13    | 0.61    | -            |
| Sex (F):klotho                                     | 0.72     | 11.80     | 0.06    | 0.95    | -            |
| <b>Middle-age mice: Probe Trial</b>                |          |           |         |         |              |
| Sex (F)                                            | 16.48    | 9.59      | 1.72    | 0.11    | -            |
| Sex (F):klotho                                     | -17.76   | 13.57     | -1.31   | 0.21    | -            |

F=Female

**A**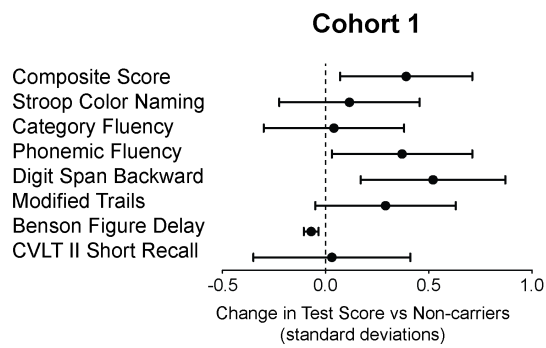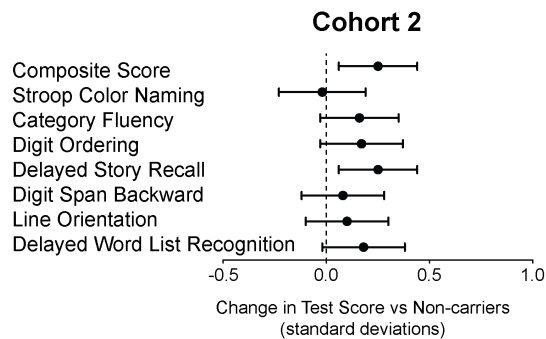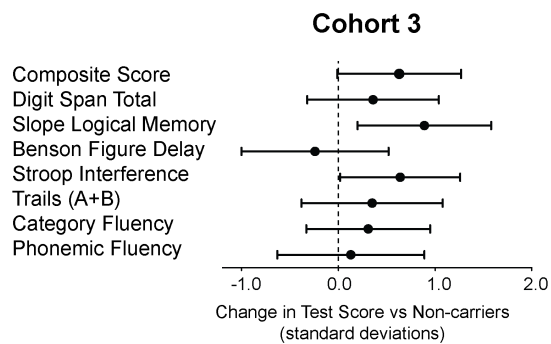**B**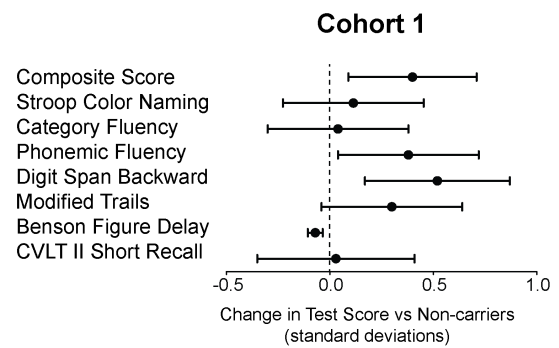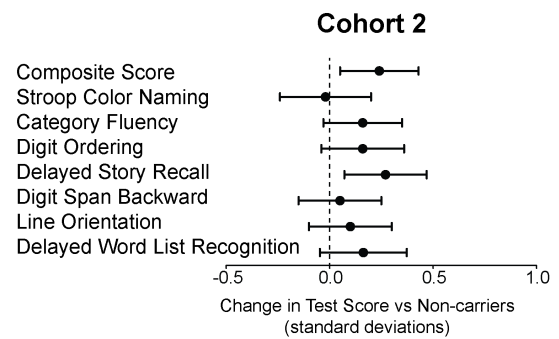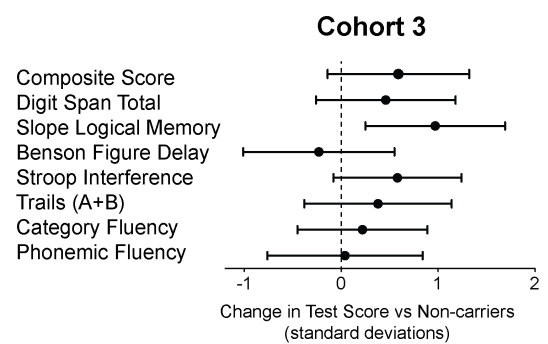

**Supplemental Figure 1. Estimated changes associated with the KL-VS genotype in composite and individual neuropsychological test scores, Related to Figure 1.** Each plot represents a maximum likelihood estimate of the KL-VS genotype effect on the composite score or specific test score with 95% confidence bounds after adjusting for (A) age, sex, and education or (B) age, sex, education and *APOE*  $\epsilon$ 4 carrier status. Mean results in non-carriers were used as a reference point (dotted line). Positive changes in test scores represent better cognitive performance.

**A**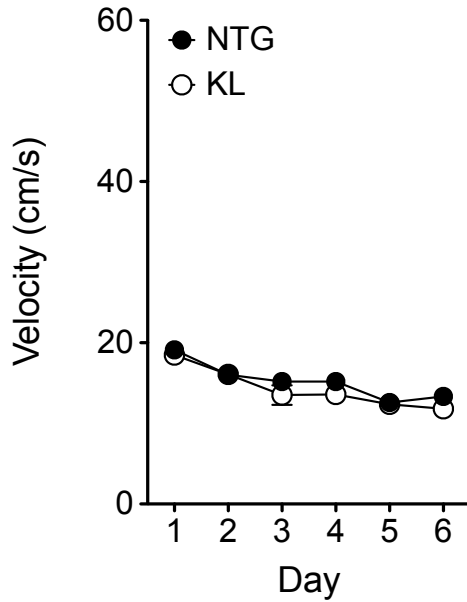**B**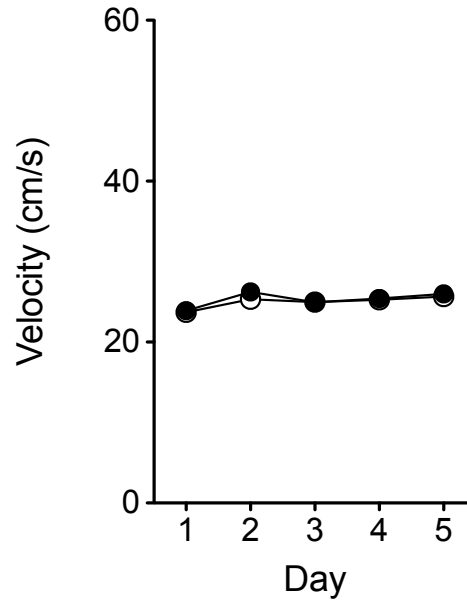**C**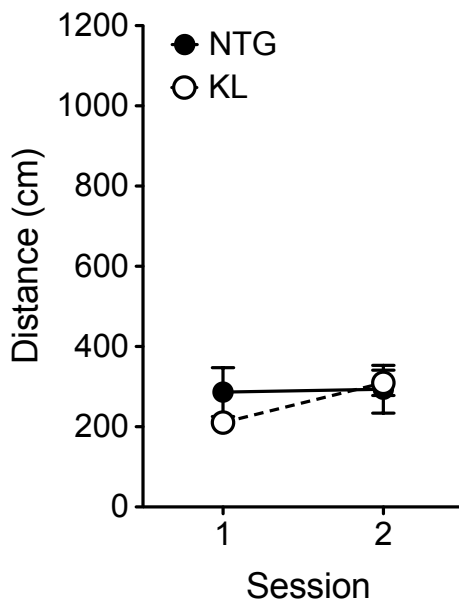**D**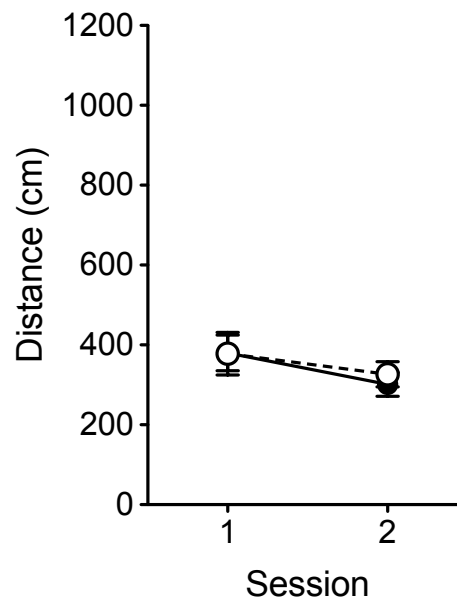

**Supplemental Figure 2. NTG and KL mice showed no differences in swim speeds or distances traveled to find a cued (visible) platform in the Morris water maze, Related to Figure 3.** (A, B) Swim speeds during hidden platform training in middle aged (10–12 months; n=8–9 per genotype) (A) and young (4–7 months; n=18–19 per genotype) (B) NTG and KL mice. (C, D) Distance traveled to find a cued (visible) platform in the water maze by middle-aged (C) and young (D) NTG and KL mice. Data are means  $\pm$  SEM.

**A**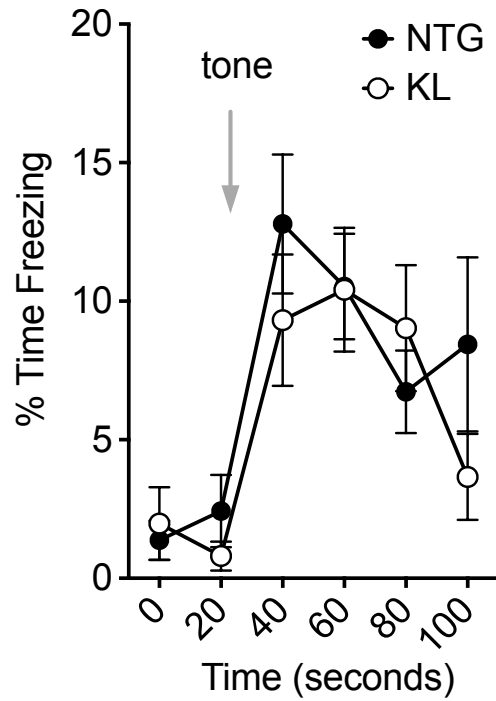**B**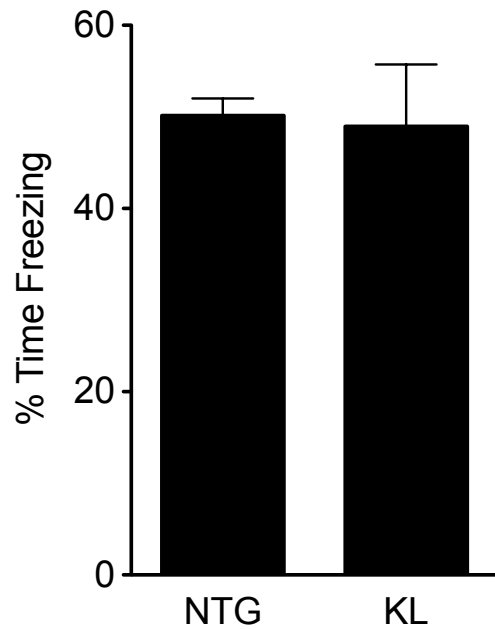

**Supplemental Figure 3. NTG and KL mice showed no difference in hippocampus-independent cued recall to tone presentation in a different context, Related to Figure 4.** Freezing was measured 24 h after training (n=6–7 mice per genotype, age 5–7 months). (A, B) Percent freezing following a 20-s tone and 60-s silence (A) and following 4 consecutive tone presentations averaged over the full testing period (B). Data are means  $\pm$  SEM.

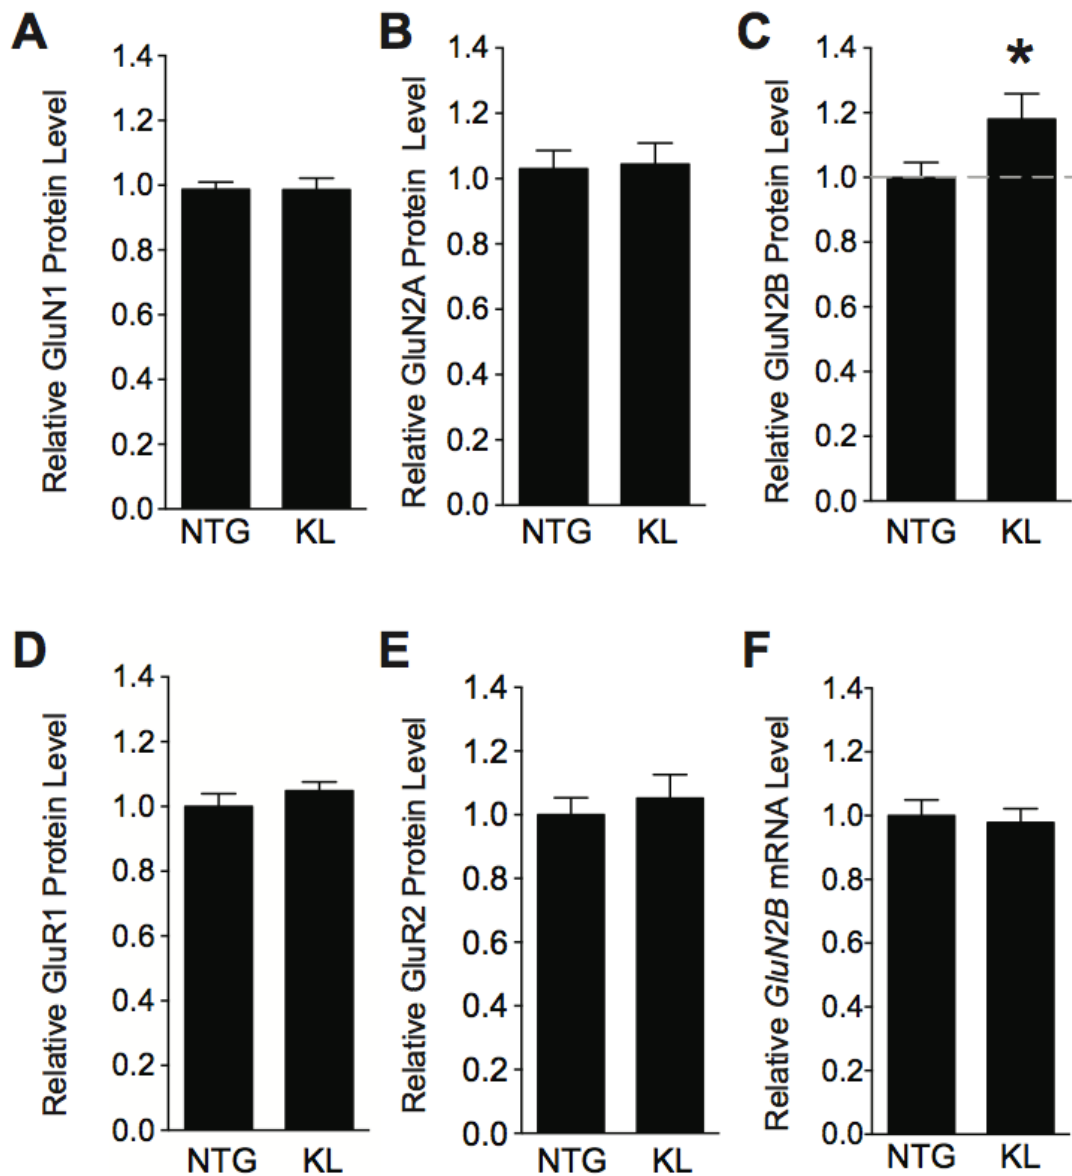

**Supplemental Figure 4. Klotho elevation increases total hippocampal protein, but not mRNA, levels of NMDA receptor subunit GluN2B and does not alter total protein levels of GluN1 and GluN2A or AMPA receptor subunits GluR1 and GluR2, Related to Figure 5.** Quantification of western blot signals from whole hippocampal homogenates relative to levels found in NTG mice (n=13–15 mice per genotype, age 3 months) for NMDA receptor subunits (A) GluN1, (B) GluN2A, (C) GluN2B, and AMPA receptor subunits (D) GluR1 and (E) GluR2. \*p<0.05 vs NTG (t-test). Actin served as a loading control and did not differ between groups (not shown). Dashed grey line is level of GluN2B protein in NTG mice. (F) Quantification of *GluN2B* mRNA levels by quantitative PCR (n=17–18 mice per genotype, age 3 months). Data are means  $\pm$  SEM.

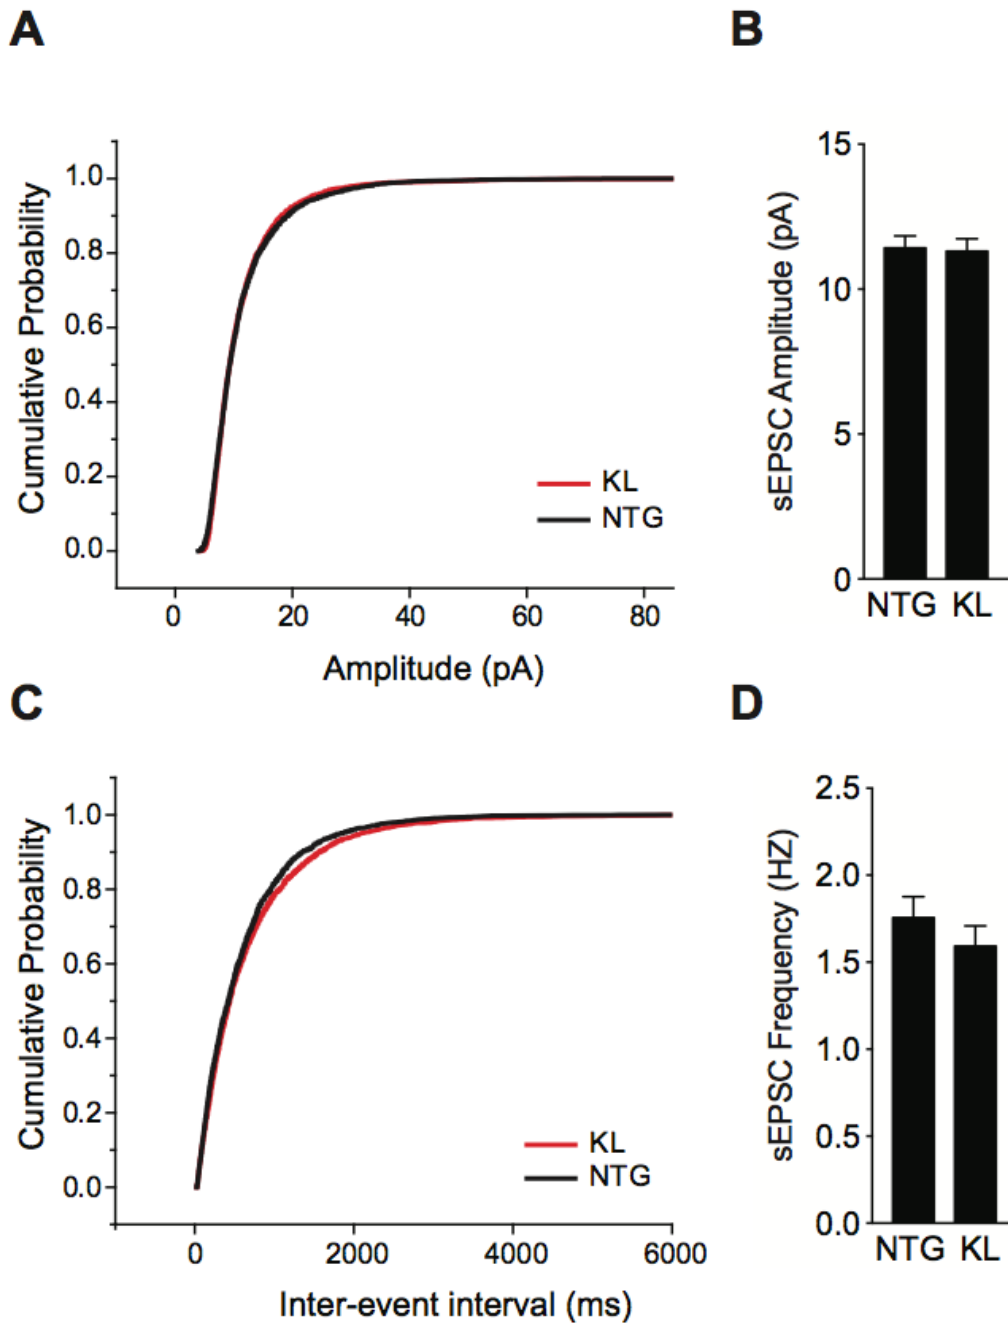

**Supplemental Figure 5. Spontaneous EPSCs (sEPSCs) of dentate granule cells in acute hippocampal slices are not significantly different between NTG and KL mice, Related to Figure 6.** (A) Cumulative plot and (B) means of sEPSC amplitudes ( $p=0.86$ , unpaired t-test). (C) Cumulative plot of sEPSC inter-event intervals. (D) Means of sEPSC frequency ( $p=0.34$ , unpaired t-test). Number of cells/mice: NTG 15/2, KL 17/2 (age 3.5–4.5 months). Data are means  $\pm$  SEM.

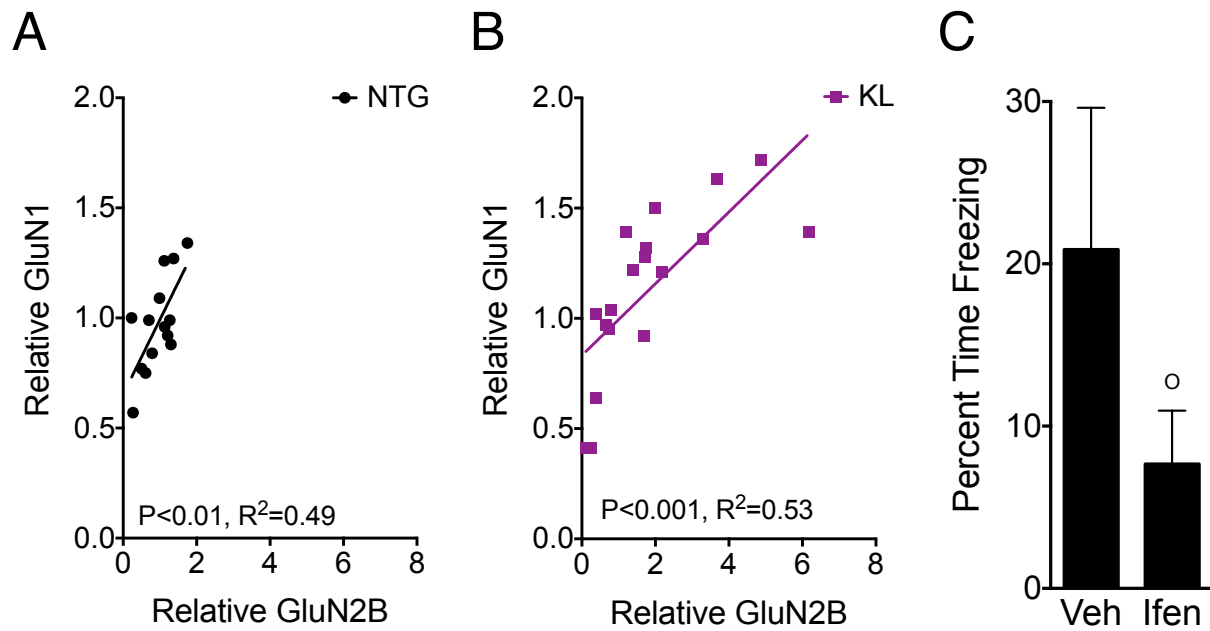

**Supplemental Figure 6. GluN1 levels correlate with GluN2B levels in PSD fractions from NTG and KL mice; and higher dose of ifenprodil suppresses percent time freezing during context testing in NTG mice trained with lower number of shocks, Related to Figure 7.** (A, B) Levels of GluN1 and GluN2B were quantified in PSD-95 enriched membrane fractions from the hippocampus of NTG (A) and KL (B) mice (age 3–4 months; 14–18 mice per group). (C) Mice ( $n=9$  per group, age 3.5–4.5 months) received a single i.p. injection of vehicle or ifenprodil (Ifen., 7.5 mg/kg) 30 min before training in a fear conditioning paradigm consisting of 2 shocks (compared to 4 shocks used in the testing paradigm of Figure 7E). The percent of time mice spent freezing during the context testing session 24 h later was monitored.  $^{\circ}p=0.08$  (t-test). Data are means  $\pm$  SEM.
